# Supplementary material for: Geometrical optimization of helical flow in grooved micromixers
Source: Royal Society of Chemistry journal article supplement (doi:10.1039/b700811b), 2007-01-01
Supplement: supp1.pdf [file supp1.pdf]

# Geometrical Optimization of Helical Flow in Grooved Micromixers

N. Scott Lynn and David S. Dandy

## Supplementary Information: Figure S1

Figure S1 displays the computational domain of a typical SGM in this study together with the non-axial  $x$ -velocity contour profile taken from the mid-plane of the channel. Numerical velocity data are exported from the midplane of the microchannel, and subsequently used to calculate the normalized transverse flow magnitude  $\eta$  for each groove/ridge structure using equation 2. The  $x$ -velocity contour profile helps explain the corkscrew flow profile displayed in figure 1. The  $x$ -velocity is positive within the grooves and negative above the ridges.

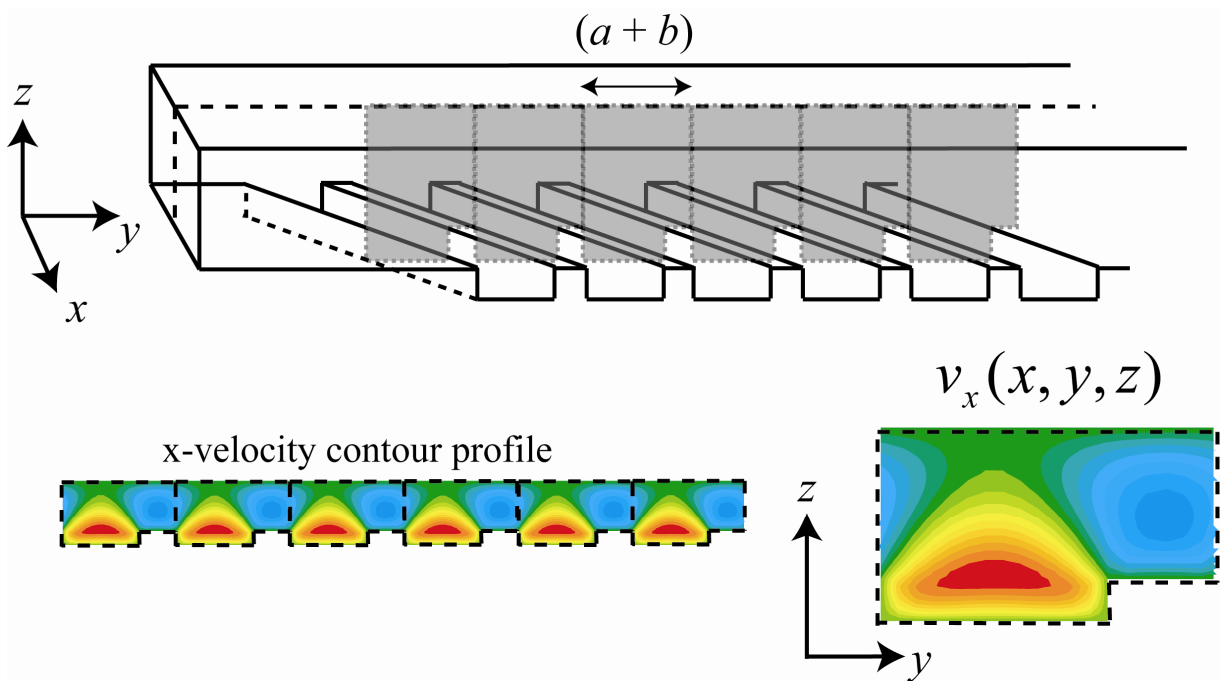

**Figure S1.** Typical computational domain used in this study. The  $x$ -velocity contour profile is shown below.
