# Supplementary material for: Geometrical optimization of helical flow in grooved micromixers
Source: Royal Society of Chemistry journal article supplement (doi:10.1039/b700811b), 2007-01-01
Supplement: supp2.pdf [file supp2.pdf]

# Geometrical Optimization of Helical Flow in Grooved Micromixers

N. Scott Lynn and David S. Dandy

## Supplementary Information: Figure S2

Figure S2 displays  $\eta$  versus the groove number (seen in figure S1, with groove 1 at the upstream end of the section) for two SGMs with  $d/h = 0.25$  and  $d/h = 0.5$ , corresponding to SGMs with  $a/w = 0.4$ ,  $b/w = 0.1$ , and  $h/w = 0.4$ . The transverse flow magnitude  $\eta$  reaches 95% of its maximum value within  $w$  axial lengths from the start of the groove structures. The SGMs within this study had grooved structures extending a minimum of  $7w$  axial lengths, typically around 1.2 mm. The drastic increase of  $\eta$  with increasing  $d/h$  values is evident within figure S2. The values of  $\eta$  reported in this study are  $\eta_{\max}$ , shown by the dotted line.

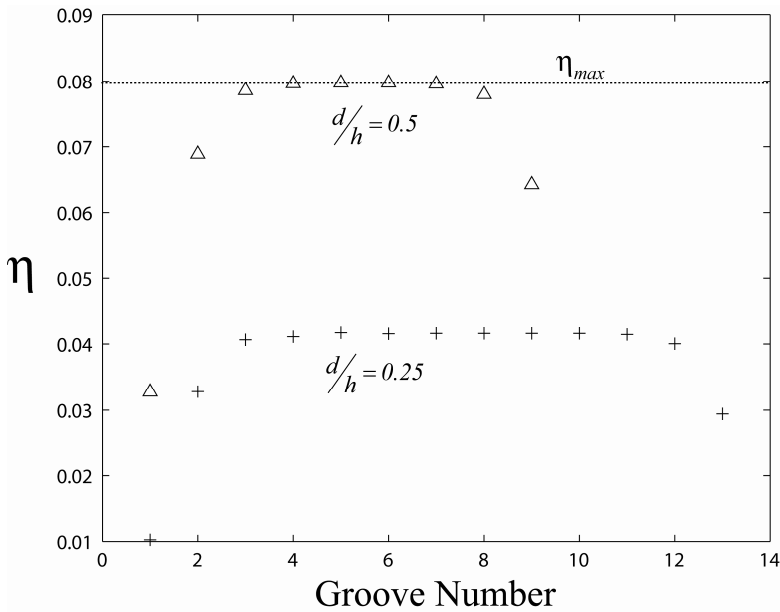

**Figure S2.**  $\eta$  vs. the groove number for two different SGMs.
