# Supplementary material for: Geometrical optimization of helical flow in grooved micromixers
Source: Royal Society of Chemistry journal article supplement (doi:10.1039/b700811b), 2007-01-01
Supplement: supp3.pdf [file supp3.pdf]

# Geometrical Optimization of Helical Flow in Grooved Micromixers

N. Scott Lynn and David S. Dandy

## Supplementary Information: Figure S3

Figure S3 displays the optimized values of  $\eta$  as a function of the channel aspect ratio  $h/w$  for the range of parameters considered in this study. The curves shown in figure S3 had no dependence on the ridge length ratio  $b/w$ . These results are in contradiction with previous studies of flow over grooved structures, which concluded that the  $h/w$  ratio had negligible impact on mixing efficiency. It is clear from figure S3 that  $h/w$  is an important parameter in the design of optimized SHM-type mixing devices. The optimized values of  $h/w$  for  $d/h < 0.6$  and  $d/h > 1.6$  lie outside the range of parameters examined in this study.

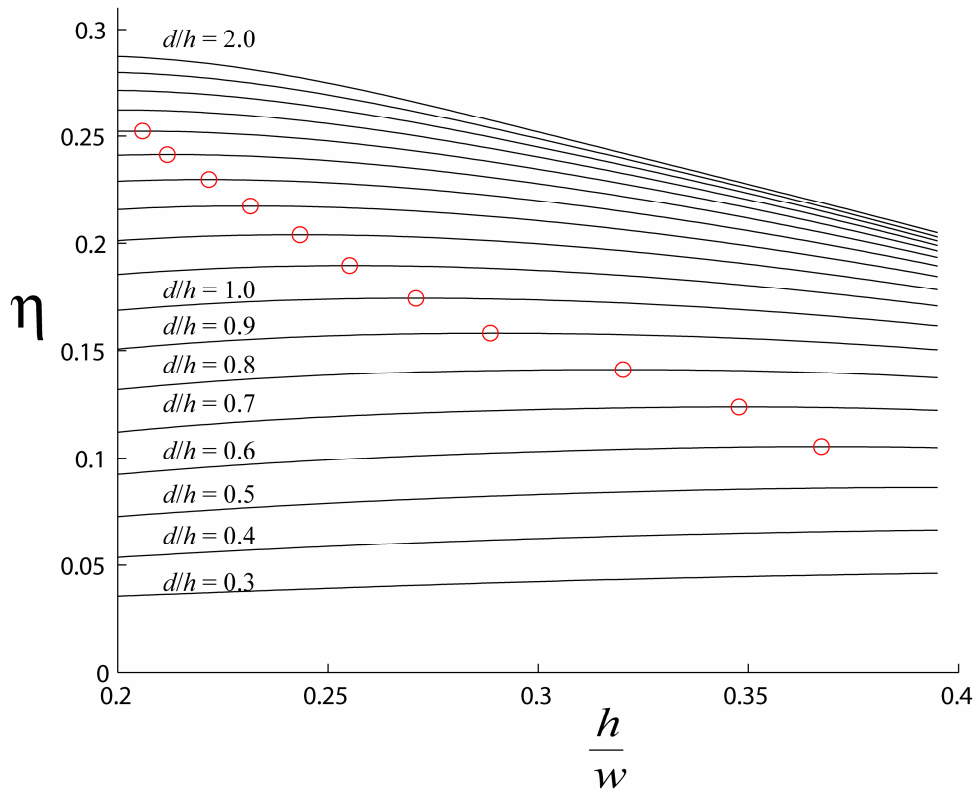

**Figure S3.**  $\eta$  vs.  $h/w$  for channels with  $b/w = 0.15$  and  $d/h$  ranging in increments of 0.3 to 2.0. The maximum values of  $\eta$  on each line are shown with the red circles.
